# Supplementary material for: Caribbean-wide decline in carbonate production threatens coral reef growth
Source: PubMed Central journal article supplement — Nat Commun. 2013 Jan 29;4:1402–. doi: 10.1038/ncomms2409 (PMC3660652; doi:10.1038/ncomms2409), 2013-01-29
Supplement: ncomms2409-s1.pdf [file ncomms2409-s1.pdf]

## Perry et al. Caribbean-wide decline in carbonate production threatens coral reef growth

### Supplementary Information

Supplementary Table S1. Sites, habitat and gross and net reef carbonate production rates across the Caribbean.

Supplementary Table S2. Type III Tests of Fixed Effects

Supplementary Table S3. Estimates of Covariance Parameters

Supplementary Methods. Linear Mixed Effects Modelling

### Supplementary Table S1. Site, habitat and gross and net reef carbonate production rates across the Caribbean.

Sites and habitats examined in each country and metrics on live coral cover, rugosity, gross production and erosion, net production and accretion rates. Site abbreviations: CR – Cathedral Rock; HW – Hole-in-the-Wall; SS – ski slopes; CBR – Columbus Reef; SWC – Southwater caye; TBR – Tobacco Reef; CAI – Cai; NDR – No dive reserve; WH – White Hole; BAR – Babylon Reef; DF – Don Fosters; PAL – Pallas Reef; SPR – Spotts Reef. Habitat abbreviations: SEMR – Shelf edge *Montastraea* reef; APZ – *Acropora palmata* zone; FRMZ – Fore-reef *Montastraea* zone; SHG – Shallow hardground; FRS – Fore-reef slope.

| Country | Site | Transect | Depth (m) | Habitat | LCC (%) | Gross production (kg CaCO <sub>3</sub> /m <sup>2</sup> /yr) | Gross erosion (kg CaCO <sub>3</sub> /m <sup>2</sup> /yr) | Net production (kg CaCO <sub>3</sub> /m <sup>2</sup> /yr) | Accretion rate (mm yr <sup>-1</sup> ) |
|---------|------|----------|-----------|---------|---------|-------------------------------------------------------------|----------------------------------------------------------|-----------------------------------------------------------|---------------------------------------|
| Bahamas | CR   | 1        | 19        | SEMR    | 7.88    | 2.04                                                        | 1.49                                                     | 0.56                                                      | 0.57                                  |
| Bahamas | CR   | 2        | 19        | SEMR    | 9.61    | 1.94                                                        | 1.51                                                     | 0.43                                                      | 0.49                                  |
| Bahamas | CR   | 3        | 19        | SEMR    | 5.69    | 1.25                                                        | 1.54                                                     | -0.29                                                     | 0.05                                  |
| Bahamas | HW   | 1        | 17        | SEMR    | 5.11    | 1.10                                                        | 1.70                                                     | -0.60                                                     | -0.21                                 |
| Bahamas | HW   | 2        | 17        | SEMR    | 4.09    | 1.06                                                        | 1.71                                                     | -0.65                                                     | -0.23                                 |
| Bahamas | HW   | 3        | 17        | SEMR    | 4.57    | 1.33                                                        | 1.64                                                     | -0.31                                                     | -0.01                                 |
| Bahamas | SS   | 1        | 20        | SEMR    | 12.51   | 1.80                                                        | 1.20                                                     | 0.60                                                      | 0.57                                  |
| Bahamas | SS   | 2        | 20        | SEMR    | 5.84    | 1.37                                                        | 1.17                                                     | 0.20                                                      | 0.29                                  |
| Bahamas | SS   | 3        | 20        | SEMR    | 10.81   | 2.56                                                        | 1.26                                                     | 1.30                                                      | 1.05                                  |
| Belize  | CBR  | 1        | 5         | APZ     | 14.23   | 2.09                                                        | 1.93                                                     | 0.16                                                      | 0.42                                  |
| Belize  | CBR  | 2        | 5         | APZ     | 16.26   | 3.11                                                        | 2.12                                                     | 0.99                                                      | 1.03                                  |
| Belize  | CBR  | 3        | 5         | APZ     | 16.25   | 2.67                                                        | 2.00                                                     | 0.67                                                      | 0.78                                  |
| Belize  | CBR  | 4        | 5         | APZ     | 36.65   | 5.65                                                        | 2.01                                                     | 3.64                                                      | 2.86                                  |
| Belize  | CBR  | 5        | 5         | APZ     | 22.58   | 3.14                                                        | 2.11                                                     | 1.03                                                      | 1.09                                  |
| Belize  | CBR  | 6        | 5         | APZ     | 14.37   | 2.23                                                        | 2.30                                                     | -0.07                                                     | 0.34                                  |
| Belize  | CBR  | 1        | 10        | FRMZ    | 17.16   | 3.70                                                        | 0.94                                                     | 2.76                                                      | 2.03                                  |
| Belize  | CBR  | 2        | 10        | FRMZ    | 26.99   | 3.76                                                        | 0.89                                                     | 2.87                                                      | 2.11                                  |
| Belize  | CBR  | 3        | 10        | FRMZ    | 15.60   | 1.54                                                        | 1.02                                                     | 0.52                                                      | 0.49                                  |
| Belize  | CBR  | 4        | 10        | FRMZ    | 13.24   | 3.27                                                        | 1.00                                                     | 2.27                                                      | 1.69                                  |
| Belize  | CBR  | 5        | 10        | FRMZ    | 9.06    | 1.22                                                        | 0.87                                                     | 0.35                                                      | 0.36                                  |
| Belize  | CBR  | 6        | 10        | FRMZ    | 7.70    | 1.15                                                        | 0.98                                                     | 0.17                                                      | 0.23                                  |
| Belize  | SWC  | 1        | 5         | APZ     | 17.43   | 3.76                                                        | 2.39                                                     | 1.37                                                      | 1.32                                  |
| Belize  | SWC  | 2        | 5         | APZ     | 7.34    | 0.94                                                        | 2.27                                                     | -1.33                                                     | -0.56                                 |
| Belize  | SWC  | 3        | 5         | APZ     | 16.99   | 2.91                                                        | 2.33                                                     | 0.58                                                      | 0.79                                  |
| Belize  | SWC  | 4        | 5         | APZ     | 14.26   | 2.66                                                        | 2.13                                                     | 0.53                                                      | 0.70                                  |
| Belize  | SWC  | 5        | 5         | APZ     | 8.52    | 1.94                                                        | 2.31                                                     | -0.37                                                     | 0.10                                  |
| Belize  | SWC  | 6        | 5         | APZ     | 12.90   | 1.48                                                        | 2.23                                                     | -0.75                                                     | -0.17                                 |
| Belize  | SWC  | 1        | 10        | FRMZ    | 31.50   | 7.26                                                        | 1.03                                                     | 6.23                                                      | 4.44                                  |
| Belize  | SWC  | 2        | 10        | FRMZ    | 24.52   | 11.73                                                       | 1.05                                                     | 10.68                                                     | 7.51                                  |
| Belize  | SWC  | 3        | 10        | FRMZ    | 13.44   | 3.20                                                        | 0.89                                                     | 2.31                                                      | 1.72                                  |
| Belize  | SWC  | 4        | 10        | FRMZ    | 10.16   | 1.96                                                        | 1.09                                                     | 0.87                                                      |                                       |

|           |     |   |    |      |       |       |      |       |       |
|-----------|-----|---|----|------|-------|-------|------|-------|-------|
| Belize    | SWC | 5 | 10 | FRMZ | 22.07 | 3.06  | 0.90 | 2.16  | 1.61  |
| Belize    | SWC | 6 | 10 | FRMZ | 23.49 | 3.30  | 0.85 | 2.45  | 1.82  |
| Belize    | TBR | 1 | 5  | APZ  | 12.77 | 5.21  | 1.72 | 3.49  | 2.68  |
| Belize    | TBR | 2 | 5  | APZ  | 13.97 | 1.54  | 1.78 | -0.24 | 0.12  |
| Belize    | TBR | 3 | 5  | APZ  | 19.37 | 5.41  | 1.73 | 3.68  | 2.80  |
| Belize    | TBR | 4 | 5  | APZ  | 15.68 | 3.92  | 1.99 | 1.93  | 1.64  |
| Belize    | TBR | 5 | 5  | APZ  | 8.56  | 1.60  | 2.03 | -0.43 | 0.04  |
| Belize    | TBR | 6 | 5  | APZ  | 16.75 | 1.98  | 2.06 | -0.08 | 0.32  |
| Belize    | TBR | 1 | 10 | FRMZ | 24.04 | 3.13  | 1.30 | 1.83  | 1.46  |
| Belize    | TBR | 2 | 10 | FRMZ | 18.15 | 2.90  | 1.25 | 1.65  | 1.31  |
| Belize    | TBR | 3 | 10 | FRMZ | 8.80  | 1.51  | 1.26 | 0.25  | 0.34  |
| Belize    | TBR | 4 | 10 | FRMZ | 4.06  | 0.70  | 1.16 | -0.46 | -0.16 |
| Belize    | TBR | 5 | 10 | FRMZ | 8.47  | 1.09  | 1.16 | -0.07 | 0.11  |
| Belize    | TBR | 6 | 10 | FRMZ | 6.62  | 1.00  | 1.23 | -0.23 | 0.00  |
| Bonaire   | CAI | 1 | 5  | SHG  | 2.69  | 0.25  | 1.20 | -0.95 | -0.49 |
| Bonaire   | CAI | 2 | 5  | SHG  | 5.16  | 0.43  | 1.23 | -0.80 | -0.39 |
| Bonaire   | CAI | 3 | 5  | SHG  | 1.87  | 0.22  | 1.24 | -1.02 | -0.54 |
| Bonaire   | CAI | 4 | 5  | SHG  | 0.67  | 0.06  | 1.23 | -1.17 | -0.65 |
| Bonaire   | CAI | 5 | 5  | SHG  | 1.22  | 0.18  | 1.25 | -1.07 | -0.58 |
| Bonaire   | CAI | 6 | 5  | SHG  | 4.56  | 0.45  | 1.28 | -0.83 | -0.41 |
| Bonaire   | CAL | 1 | 10 | FRS  | 28.58 | 4.78  | 2.38 | 2.40  | 2.05  |
| Bonaire   | CAL | 2 | 10 | FRS  | 23.38 | 4.20  | 2.46 | 1.74  | 1.60  |
| Bonaire   | CAL | 3 | 10 | FRS  | 23.47 | 5.07  | 2.43 | 2.64  | 2.22  |
| Bonaire   | CAL | 4 | 10 | FRS  | 25.60 | 4.83  | 2.34 | 2.49  | 2.12  |
| Bonaire   | CAL | 5 | 10 | FRS  | 31.02 | 6.18  | 2.29 | 3.89  | 3.07  |
| Bonaire   | CAL | 6 | 10 | FRS  | 18.01 | 3.14  | 2.44 | 0.70  | 0.90  |
| Bonaire   | NDR | 1 | 5  | APZ  | 10.42 | 2.14  | 2.99 | -0.85 | -0.11 |
| Bonaire   | NDR | 2 | 5  | APZ  | 48.35 | 18.56 | 3.32 | 15.24 | 11.03 |
| Bonaire   | NDR | 3 | 5  | APZ  | 28.99 | 8.32  | 3.16 | 5.16  | 4.05  |
| Bonaire   | NDR | 4 | 5  | APZ  | 30.22 | 7.85  | 3.17 | 4.68  | 3.73  |
| Bonaire   | NDR | 5 | 5  | APZ  | 13.08 | 2.29  | 3.03 | -0.74 | -0.01 |
| Bonaire   | NDR | 6 | 5  | APZ  | 13.71 | 1.34  | 3.08 | -1.74 | -0.69 |
| Bonaire   | NDR | 1 | 10 | FRMZ | 24.66 | 13.02 | 2.93 | 10.09 | 7.38  |
| Bonaire   | NDR | 2 | 10 | FRMZ | 22.25 | 6.12  | 2.61 | 3.51  | 2.81  |
| Bonaire   | NDR | 3 | 10 | FRMZ | 39.45 | 15.85 | 2.59 | 13.26 | 9.57  |
| Bonaire   | NDR | 4 | 10 | FRMZ | 14.70 | 8.28  | 2.92 | 5.36  | 4.09  |
| Bonaire   | NDR | 5 | 10 | FRMZ | 45.75 | 19.26 | 2.58 | 16.68 | 11.93 |
| Bonaire   | NDR | 6 | 10 | FRMZ | 21.19 | 11.11 | 2.90 | 8.21  | 6.07  |
| Bonaire   | WH  | 1 | 10 | FRS  | 9.47  | 0.95  | 1.97 | -1.02 | -0.40 |
| Bonaire   | WH  | 2 | 10 | FRS  | 17.46 | 5.12  | 2.05 | 3.07  | 2.43  |
| Bonaire   | WH  | 3 | 10 | FRS  | 19.80 | 3.52  | 2.06 | 1.46  | 1.31  |
| Bonaire   | WH  | 4 | 10 | FRS  | 18.79 | 1.86  | 2.00 | -0.14 | 0.21  |
| Bonaire   | WH  | 5 | 10 | FRS  | 14.33 | 2.25  | 2.15 | 0.10  | 0.38  |
| Bonaire   | WH  | 6 | 10 | FRS  | 20.33 | 4.49  | 2.04 | 2.45  | 2.00  |
| Gd Cayman | BAR | 1 | 10 | FRS  | 11.67 | 2.23  | 1.88 | 0.35  | 0.51  |
| Gd Cayman | BAR | 2 | 10 | FRS  | 3.91  | 1.52  | 1.90 | -0.38 | 0.01  |
| Gd Cayman | BAR | 3 | 10 | FRS  | 20.03 | 5.19  | 1.87 | 3.32  | 2.57  |
| Gd Cayman | DF  | 1 | 5  | SHG  | 7.63  | 0.97  | 2.73 | -1.76 | -0.75 |
| Gd Cayman | DF  | 2 | 5  | SHG  | 10.16 | 1.33  | 2.52 | -1.19 |       |

|           |     |   |    |      |       |      |      |       |       |
|-----------|-----|---|----|------|-------|------|------|-------|-------|
| Gd Cayman | DF  | 3 | 5  | SHG  | 4.98  | 0.86 | 2.75 | -1.89 | -0.85 |
| Gd Cayman | DF  | 4 | 5  | SHG  | 1.28  | 0.32 | 2.64 | -2.32 | -1.17 |
| Gd Cayman | DF  | 5 | 5  | SHG  | 7.68  | 1.47 | 2.60 | -1.13 | -0.37 |
| Gd Cayman | DF  | 6 | 5  | SHG  | 2.22  | 0.36 | 2.65 | -2.29 | -1.16 |
| Gd Cayman | DF  | 1 | 10 | FRMZ | 16.36 | 7.86 | 3.71 | 4.15  | 3.43  |
| Gd Cayman | DF  | 2 | 10 | FRMZ | 15.14 | 3.9  | 3.61 | 0.29  | 0.75  |
| Gd Cayman | DF  | 3 | 10 | FRMZ | 13.05 | 3.45 | 3.63 | -0.18 | 0.43  |
| Gd Cayman | DF  | 4 | 10 | FRMZ | 13.52 | 5.71 | 3.57 | 2.14  | 2.03  |
| Gd Cayman | DF  | 5 | 10 | FRMZ | 17.34 | 4.46 | 3.76 | 0.70  | 1.10  |
| Gd Cayman | DF  | 6 | 10 | FRMZ | 17.01 | 4.14 | 3.79 | 0.35  | 0.87  |
| Gd Cayman | PAL | 1 | 5  | APZ  | 10.25 | 2.68 | 2.05 | 0.63  | 0.78  |
| Gd Cayman | PAL | 2 | 5  | APZ  | 5.79  | 1.14 | 2.13 | -0.99 | -0.35 |
| Gd Cayman | PAL | 3 | 5  | APZ  | 12.45 | 1.69 | 1.97 | -0.28 | 0.10  |
| Gd Cayman | PAL | 4 | 5  | APZ  | 13.05 | 3.69 | 2.16 | 1.53  | 1.41  |
| Gd Cayman | PAL | 5 | 5  | APZ  | 2.37  | 0.47 | 2.01 | -1.54 | -0.76 |
| Gd Cayman | SPR | 1 | 10 | FRMZ | 16.1  | 4.04 | 2.56 | 1.48  | 1.40  |
| Gd Cayman | SPR | 2 | 10 | FRMZ | 25.97 | 5.36 | 2.57 | 2.79  | 2.31  |
| Gd Cayman | SPR | 3 | 10 | FRMZ | 18.78 | 3.91 | 2.60 | 1.31  | 1.29  |
| Gd Cayman | SPR | 4 | 10 | FRMZ | 14.13 | 2.09 | 2.56 | -0.47 | 0.06  |
| Gd Cayman | SPR | 5 | 10 | FRMZ | 21.19 | 4.90 | 2.61 | 2.29  | 1.97  |
| Gd Cayman | SPR | 6 | 10 | FRMZ | 14.54 | 3.11 | 2.57 | 0.54  | 0.75  |

**Supplementary Table S2. Type III Tests of Fixed Effects**

**Type III Tests of Fixed Effects<sup>a</sup>**

| Source    | Numerator df | Denominator df | F       | Sig. |
|-----------|--------------|----------------|---------|------|
| Intercept | 1            | 38.599         | 55.540  | .000 |
| LCC       | 1            | 94.939         | 159.102 | .000 |
| Habitat   | 4            | 15.961         | 3.170   | .043 |

a. Dependent Variable: NPtrans.

**Supplementary Table S3. Estimates of Covariance Parameters**

**Estimates of Covariance Parameters<sup>a</sup>**

| Parameter                                            | Estimate            | Std. Error | Wald Z | Sig. | 95% Confidence Interval |             |
|------------------------------------------------------|---------------------|------------|--------|------|-------------------------|-------------|
|                                                      |                     |            |        |      | Lower Bound             | Upper Bound |
| Residual                                             | .012383             | .001935    | 6.400  | .000 | .009117                 | .016820     |
| Intercept + Habitat<br>[subject = Country *<br>Reef] | Variance<br>.003212 | .001638    | 1.961  | .050 | .001182                 | .008727     |

**Supplementary Methods: Linear Mixed Effects Modelling**

Linear mixed effects models were chosen to examine relationships between G and potential controls including the percentage cover of hard corals and macroalgae (Pinheiro and Bates 2000, Zuur et al. 2009). The spatial nature of the data meant that transects within reefs were likely to be more similar to each other than to transects on other reefs. The data were also unbalanced as the number of transects surveyed at each reef was not constant. Consequently, linear mixed effects models were chosen to examine the relationships between net carbonate production (G) and potential controls including the percentage cover of hard corals and macroalgae. All modelling was performed in SPSS 19. Initially a saturated model was chosen, such that all sensible fixed and random effects of interest were included. The data was nested within reef and country and restricted maximum likelihood estimation was used to run the model. Thereafter, Akaike Information Criterion (AIC) was used to select a suitable covariance structure and subsequently the best combination of random effects (see Supplementary Tables S2 and S3). This model was assessed graphically by examining a histogram of the standardised residuals to check for normality and by plotting the residuals versus the predicted values. Heterogeneity of variance was clear at this stage and the dependent variable (net carbonate production) was transformed:  $\log(y + 3)$ . The model was run again with the transformed data as the dependent variable and the assumptions of normality and homogeneity of variance were confirmed. The fixed effects were then assessed by examining the significance of regression parameters (Pinheiro and Bates 2000, Zuur et al. 2009). The final model is described below using the SPSS syntax and important outputs:

```
MIXED NPtrans BY Country Habitat WITH LCC
  /CRITERIA=CIN(95) MXITER(1000) MXSTEP(1000) SCORING(1) SINGULAR(0.000000000001) HCONVERGE(0,
ABSOLUTE) LCONVERGE(0, ABSOLUTE) PCONVERGE(0.000001, ABSOLUTE)
  /FIXED=LCC Habitat | SSTYPE(3)
  /METHOD=REML
  /PRINT=SOLUTION TESTCOV
  /RANDOM=INTERCEPT Habitat | SUBJECT(Country*Reef) COVTYPE(ID).
```

- Pinheiro, J.C & Bates, D.M. Mixed-Effects Models in S and S-Plus. Springer 528 p. (2000)
- Zuur, A.F., Ieno, E.N., Walker, N.J., Saveliev, A.A. & Smith, G.M. Mixed Effects Models and Extensions in Ecology with R. Springer 574 p. (2009).
